# Supplementary material for: Exploring Disparities in Maternal Residential Proximity to Unconventional Gas Development in the Barnett Shale in North Texas
Source: Int J Environ Res Public Health. 2019 Jan 23;16(3):298. doi: 10.3390/ijerph16030298 (PMC6388132; doi:10.3390/ijerph16030298)
Supplement: Supplementary file 1 [file ijerph-16-00298-s001.pdf]

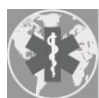

**Supplementary Table 1.** Multivariable associations between sociodemographic variables and the count of active UGD wells within 0.8 km of residential address among 164,658 women with a singleton birth in the 24-county Barnett Shale area, Texas, 2010–2012, stratified by rurality.

|                                              | Urban <sup>1,2</sup> (n = 143,766) |                         | Rural (n = 20,889) |                         |
|----------------------------------------------|------------------------------------|-------------------------|--------------------|-------------------------|
|                                              | n                                  | Count Ratio<br>(95% CI) | n                  | Count Ratio<br>(95% CI) |
| Maternal age (years)                         |                                    |                         |                    |                         |
| ≤ 20                                         | 21,025                             | 1.0 (ref)               | 3,749              | 1.0 (ref)               |
| 21–25                                        | 34,969                             | 1.08 (1.01, 1.16)       | 6,390              | 1.03 (0.91, 1.18)       |
| 26–30                                        | 41,034                             | 1.12 (1.05, 1.20)       | 5,876              | 1.11 (0.97, 0.28)       |
| 31–35                                        | 31,540                             | 1.01 (0.97, 1.09)       | 3,378              | 1.29 (1.10, 1.51)       |
| 36+                                          | 15,200                             | 1.01 (0.93, 1.10)       | 1,497              | 1.12 (0.92, 1.37)       |
| Maternal education                           |                                    |                         |                    |                         |
| College graduate                             | 35,462                             | 1.0 (ref)               | 3,654              | 1.0 (ref)               |
| Some college                                 | 33,896                             | 1.34 (1.26, 1.43)       | 6,896              | 0.97 (0.85, 1.11)       |
| High school graduate                         | 44,165                             | 1.12 (1.05, 1.19)       | 6,195              | 1.06 (0.91, 1.22)       |
| Less than high school                        | 30,166                             | 1.39 (1.29, 1.50)       | 4,103              | 0.94 (0.80, 1.11)       |
| Maternal race/ethnicity                      |                                    |                         |                    |                         |
| Non-Hispanic White                           | 47,568                             | 1.0 (ref)               | 14,208             | 1.0 (ref)               |
| Hispanic                                     | 60,243                             | 0.65 (0.61, 0.68)       | 5,168              | 0.94 (0.84, 1.04)       |
| Non-Hispanic Black                           | 25,389                             | 0.83 (0.78, 0.89)       | 1,011              | 0.61 (0.48, 0.76)       |
| Other                                        | 10,568                             | 0.75 (0.69, 0.79)       | 503                | 0.89 (0.66, 1.19)       |
| Adequacy of prenatal care                    |                                    |                         |                    |                         |
| Adequate                                     | 6,266                              | 1.0 (ref)               | 1,216              | 1.0 (ref)               |
| Inadequate                                   | 31,564                             | 1.17 (1.11, 1.24)       | 3,592              | 1.20 (1.06, 1.36)       |
| Intermediate                                 | 21,381                             | 0.99 (0.11, 1.05)       | 2,956              | 1.15 (1.01, 1.32)       |
| Adequate plus                                | 58,906                             | 0.86 (8.11, 0.92)       | 8,888              | 0.87 (0.77, 0.98)       |
| Unknown                                      | 25,651                             | 0.61 (6.11, 0.68)       | 4,238              | 0.97 (0.80, 1.19)       |
| ICE Race/ethnicity and income <sup>3,4</sup> |                                    |                         |                    |                         |
| Tertile 3 (high)                             | 44,548                             | 1.0 (ref)               | 9,915              | 1.0 (ref)               |
| Tertile 2                                    | 46,186                             | 0.66 (0.63, 0.70)       | 9,781              | 0.61 (0.75, 0.67)       |
| Tertile 1 (low)                              | 53,032                             | 0.75 (0.71, 0.79)       | 1,193              | 0.48 (0.39, 0.60)       |

CI = confidence interval; ref = reference category; ICE = Index of Concentration at the Extremes; <sup>1</sup> Model included maternal age (years), maternal education, maternal race/ethnicity, prenatal care utilization index, and ICE race/ethnicity and income; <sup>2</sup> Census tracts classified as urban if located within Dallas, Denton, or Tarrant counties; <sup>3</sup> n=3 missing; <sup>4</sup> ICE categorized into tertiles for stratified analysis due to small sample sizes in rural subsample, cutpoints (−1 = extreme concentration of deprivation; 1 = extreme concentration of privilege) tertile 1: 0 to <−0.116, tertile 2: −0.116 to <0.106, tertile 3: 0.106 to 1.

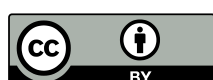

© 2019 by the authors. Submitted for possible open access publication under the terms and conditions of the Creative Commons Attribution (CC BY) license (<http://creativecommons.org/licenses/by/4.0/>).
